# Supplementary material
Source: Springer Nature journal article supplement (https://www.springermedizin.de/resource/supplementary/13000_2011_415_MOESM2_ESM.pdf/9624510)

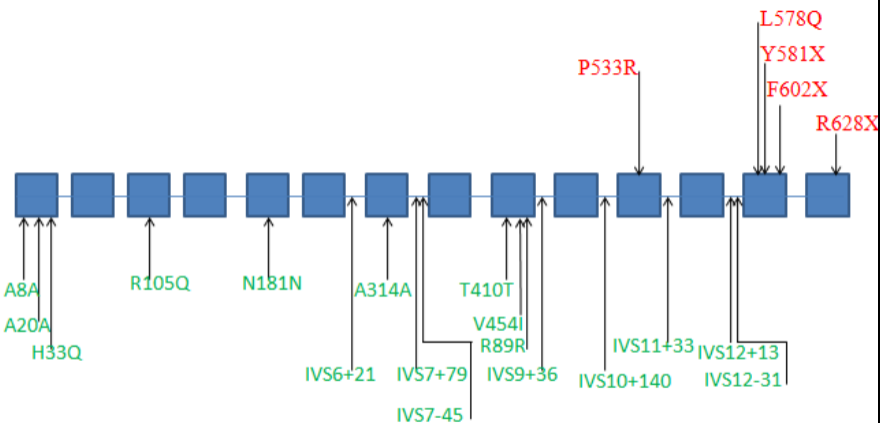

— Mutations

— Polymorphisms

Supplement: MOESM2 [file 9624510]
